# Supplementary material for: Transcriptional activities of methanogens and methanotrophs vary with methane emission flux in rice soils under chronic nutrient constraints of phosphorus and potassium
Source: Copernicus journal article supplement (doi:10.5194/bg-13-6507-2016), 2016-12-13
Supplement: Supplementary file 1 [file bg-2016-213-supplement-version2.pdf › bg-2016-213-supplement-version2.pdf]

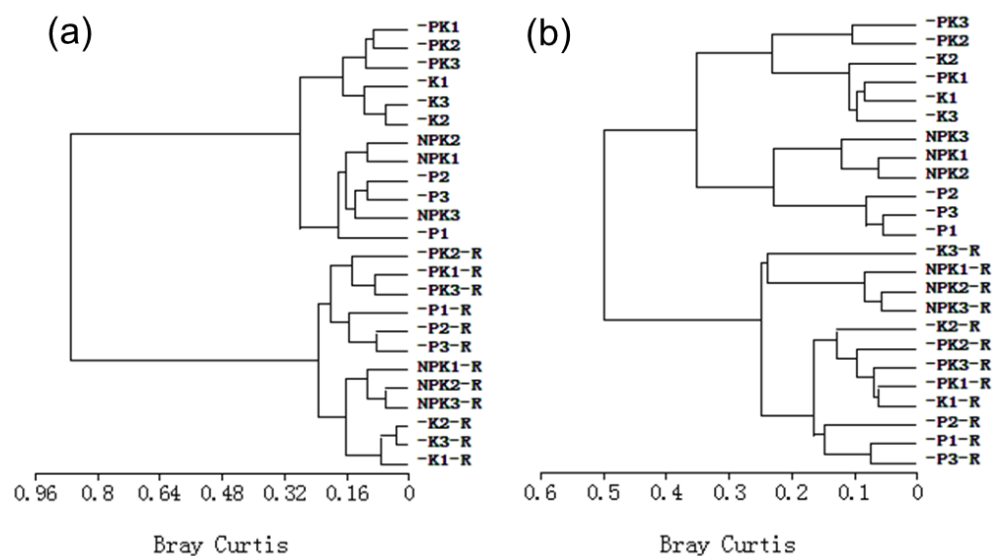

Supplement Fig. 1 Cluster analysis of *mcrA*-(a) and *pmoA*-based (b) T-RFLP profiles from rice ripening stage. Letters “R” after the treatments indicate samples from mRNA-derived profile. **NPK**, balance chemical fertilization; **-K**, potassium deficient; **-P**, phosphorus deficient; **-PK**, phosphorus and potassium deficient.
