# Supplementary material for: Transcriptional activities of methanogens and methanotrophs vary with methane emission flux in rice soils under chronic nutrient constraints of phosphorus and potassium
Source: Copernicus journal article supplement (doi:10.5194/bg-13-6507-2016), 2016-12-13
Supplement: Supplementary file 1 [file Copy of Raw data.xlsx]

## Sheet: soil properties
	SOC	TN	TP	TK	AP	AK	pH
	(g kg-1)	(N g kg-1)	(P g kg-1)	(K g kg-1)	(P mg kg-1)	(K mg kg-1)	(1:2.5 H2O)
NPK1	20.3664	1.91178	0.709088	13.7851	11.6944	105.155	5.32
NPK2	19.6126	1.99716	0.638116	13.7015	11.0553	172.165	5.1
NPK3	21.6087	1.82639	0.726802	13.5949	13.9365	128.866	5.03
-K1	20.121	1.93802	0.606525	13.2442	12.6052	67.0103	5.03
-K2	20.8368	2.26439	0.727514	13.9685	15.5355	65.9794	5.13
-K3	20.575	2.1012	0.654318	14.0926	14.988	57.2165	5.33
-P1	18.6641	1.82709	0.461582	14.0758	5.3618	132.99	5.15
-P2	18.536	1.86148	0.354891	14.3012	3.33425	177.32	5.54
-P3	18.6142	1.89586	0.437113	13.691	4.65052	106.186	5.13
-PK1	17.813	1.89929	0.37751	13.6732	3.83828	62.8866	5.06
-PK2	18.0055	2.01894	0.489435	13.8828	4.54206	55.6701	5.08
-PK3	17.9885	1.95912	0.428327	13.7096	3.99939	59.2784	5.42

## Sheet: plant biomass and CH4 flux
Plant biomass (g m-2)							Methane flux
	above ground			below ground				CH4 from field(mg m-2 h-1)			CH4 flux from soil incubation(µg kg-1 h-1)
	tillering	ripening		tillering	ripening			tillering	ripening		tillering	ripening
NPK1	210.638	437.572	NPK1	72.365	107.112		NPK1	25.8275	0.501651	NPK1	108.578	6.237
NPK2	207.562	441.775	NPK2	70.11	107.932		NPK2	21.5451	0.127729	NPK2	108.159	5.58585
NPK3	205.615	461.968	NPK3	61.6025	109.675		NPK3	30.1098	0.31469	NPK3	109.04	6.18945
-K1	203.052	382.632	-K1	63.8575	102.91		-K1	15.2647	-0.723176	-K1	115.375	6.3781
-K2	186.858	370.23	-K2	61.91	104.755		-K2	23.3716	0.108599	-K2	119.542	8.3701
-K3	181.63	361.722	-K3	54.8375	103.013		-K3	19.3181	0.0130887	-K3	117.46	7.9609
-P1	133.968	380.787	-P1	52.1725	105.883		-P1	17.1158	0.18613	-P1	80.9045	5.6096
-P2	123.718	208.895	-P2	47.4575	72.6725		-P2	14.2338	0.159309	-P2	75.7797	5.6332
-P3	107.523	321.748	-P3	47.4575	102.09		-P3	15.6748	0.17272	-P3	78.34	5.53045
-PK1	119.72	330.665	-PK1	52.1725	93.3775		-PK1	20.339	0.198917	-PK1	93.4879	5.52015
-PK2	157.338	378.738	-PK2	52.5825	99.015		-PK2	23.2399	0.362623	-PK2	107.531	6.0094
-PK3	117.157	232.47	-PK3	51.5575	79.54		-PK3	21.7895	0.03521	-PK3	100.51	6.0264

## Sheet: mcrA T-RFLP
Tillering stage	DNA level		54bp	69bp	78bp	95bp	100bp	103bp	111bp	114bp	118bp	121bp	125bp	139bp	146bp	150bp	163bp	168bp	175bp	194bp	202bp	208bp	216bp	230bp	244bp	277bp	289bp	292bp	314bp	358bp	406bp
		NPK1	0	5.96031	0	0	1.61186	0	7.07071	2.90135	2.10617	0	0	0	4.65649	1.22502	0	0.394011	0	1.53306	0	0	0	1.41128	2.01304	9.10524	4.14786	42.1449	6.01046	2.14915	5.55914
		NPK2	0	4.36193	0	0	3.23517	0	7.60563	3.41443	3.34614	0	0	0	3.88391	1.90354	0	1.69014	0	1.91208	0	0	0	1.44259	3.6449	14.3662	3.78148	35.0491	3.57661	4.17414	2.61204
		NPK3	0	3.97783	0	0	3.80009	0	4.2148	1.24413	5.1881	0	0	0	4.72261	1.34992	0	6.48724	0	1.28221	0	0	0	1.48957	1.7604	12.674	1.68423	36.8753	6.95273	3.90589	2.39093
		-K1	0	3.60767	0	0	4.09429	0	8.72071	3.0556	2.81235	0	0	0	3.02856	0	0	0	0	2.68982	0	0	0	1.81101	3.16574	17.0817	4.49201	32.0476	1.40734	9.52359	2.46202
		-K2	0	4.34799	0	0	4.44732	0	9.1364	3.0211	0.92957	0	0	0	2.88991	0	0	0	0	2.98924	0	0	0	2.52821	2.99861	17.6019	5.01143	32.8629	0.378575	8.19184	2.66502
		-K3	0	2.86734	0	0	3.74125	0	8.30501	3.0901	4.69513	0	0	0	3.16721	0	0	0	0	2.3904	0	0	0	1.09382	3.33286	16.5615	3.97258	31.2323	2.4361	10.8553	2.25903
		-P1	0	4.4055	0	0	5.65488	0	6.169	1.63282	5.41509	0	0	1.64716	7.4257	1.10368	0	1.91136	0	2.00797	0	0	0	0.984925	1.65232	7.83772	1.55664	35.3882	8.07347	2.85064	4.28291
		-P2	0	4.6515	0	0	5.4881	0	6.97485	1.52978	3.28903	0	0	1.55847	6.63065	0.774453	0	0.33464	0	2.76317	0	0	0	0.717086	1.65886	8.69108	1.29553	37.7952	8.69586	1.21427	5.93747
		-P3	0	4.1595	0	0	5.82167	0	5.36314	1.73586	7.54114	0	0	1.73586	8.22075	1.4329	0	3.48809	0	1.25276	0	0	0	1.25276	1.64579	6.98436	1.81774	32.9812	7.45108	4.48702	2.62835
		-PK1	0	5.5299	0	0	4.52917	0	10.4719	3.74309	1.68547	0	0	0	2.36869	0	0	2.71352	0	3.24656	0	0	0	2.52793	3.99539	13.3074	3.24397	33.5008	2.54496	3.79613	2.79521
		-PK2	0	3.42664	0	0	4.49042	0	8.08863	2.83837	2.38247	0	0	0	2.4609	0	0	4.32374	0	2.54424	0	0	0	1.70106	3.63253	15.1625	2.55405	34.487	3.65214	5.21594	3.03936
		-PK3	0	7.63317	0	0	4.56792	0	12.8551	4.6478	0.988468	0	0	0	2.27647	0	0	1.10329	0	3.94888	0	0	0	3.3548	4.35824	11.4522	3.9339	32.5146	1.43777	2.37632	2.55105
	RNA level		54bp	69bp	78bp	95bp	100bp	103bp	111bp	114bp	118bp	121bp	125bp	139bp	146bp	150bp	163bp	168bp	175bp	194bp	202bp	208bp	216bp	230bp	244bp	277bp	289bp	292bp	314bp	358bp	406bp
		NPK1	0	0	0	6.14454	1.78145	0	19.7806	0	8.86016	0	0	0	2.21233	0	0	1.95525	0	0	2.44768	4.38482	43.4499	0	0	3.1646	0	5.81867	0	0	0
		NPK2	0	0	0	4.76342	2.27333	0	16.5953	0	9.43167	0	0	0	3.18795	0	0	2.79144	0	0	2.26275	4.17129	38.5884	0	0	6.1327	0	9.80174	0	0	0
		NPK3	0	0	0	4.3186	1.64084	0	17.4282	0	8.34093	0	0	0	2.31882	0	0	2.31313	0	0	2.21057	4.79717	44.2628	0	0	4.75729	0	7.61167	0	0	0
		-K1	1.1843	2.51006	1.74777	12.7295	0	1.25503	13.7668	0	0	0	0	0	2.60358	5.91443	0	0	2.24522	0	8.45436	0	46.3701	0	0	0	0	1.21888	0	0	0
		-K2	1.75238	2.42537	1.90375	11.447	0	1.82261	13.5069	0	0	0	0	0	3.40384	5.35327	0	0	2.12467	0	8.38209	0	45.4261	0	0	0	0	2.45196	0	0	0
		-K3	1.53897	1.73059	2.20815	12.3559	0	4.11464	15.1112	0	0	0	0	0	3.65879	4.0862	0	0	2.37432	0	9.62753	0	40.0476	0	0	0	0	3.14605	0	0	0
		-P1	1.40798	2.32387	4.64362	13.6042	1.34146		19.3791	0	1.02714	0	0	0	2.52636	4.05029	0		0	0	8.93171	0	40.7643	0	0	0	0	0	0	0	0
		-P2	1.44445	1.89047	3.87678	12.505	1.42106		12.9299	0	2.6859	0	0	0	3.10399	3.70396	0		0	0	6.15967	0	50.2789	0	0	0	0	0	0	0	0
		-P3	1.13176	0.72317	2.70827	5.87576	4.57044		11.7226	0	3.08071	0	0	0	6.91712	1.79346	0		0	0	5.53949	0	55.9372	0	0	0	0	0	0	0	0
		-PK1	3.75372	1.80166	2.66646	12.1307	5.83581	0	24.4133	0	0	0	0	0	0	4.39762	0	0	3.57982	0	5.53345	0	30.6376	0	0	0	0	3.61742	0	0	1.63246
		-PK2	2.10778	2.00147	4.03565	11.279	4.90793	0	22.5716	0	0	0	0	0	0	5.42312	0	0	3.53818	0	6.89714	0	30.266	0	0	0	0	5.98125	0	0	0.990855
		-PK3	1.34191	2.32647	2.45709	13.3156	4.45455	0	26.938	0	0	0	0	0	0	5.92461	0	0	2.77377	0	7.40823	0	29.3212	0	0	0	0	2.53349	0	0	1.20513
Ripening stage	DNA level		54bp	69bp	78bp	95bp	100bp	103bp	111bp	114bp	118bp	121bp	125bp	139bp	146bp	150bp	163bp	168bp	175bp	194bp	202bp	208bp	216bp	230bp	244bp	277bp	289bp	292bp	314bp	358bp	406bp
		NPK1	0	4.33837	0	0	1.60216	0	5.39329	3.90321	2.43951	0	0	0	5.10978	0	0	3.31641	0	0	0	0	0	0	1.50326	8.16905	3.43509	47.0627	9.35584	1.74721	2.62412
		NPK2	0	2.86086	0	0	3.19524	0	6.37191	3.10236	3.7154	0	0	0	3.33148	0	0	2.35928	0	0	0	0	0	0	2.83609	10.4093	5.64122	44.8758	6.04991	2.69367	2.55743
		NPK3	0	2.30969	0	0	3.54252	0	3.6762	2.08689	7.12217	0	0	0	5.42146	0	0	6.02302	0	0	0	0	0	0	2.35425	9.98886	3.4831	37.2967	8.42926	5.35462	2.91125
		-K1	0	3.81351	0	0	4.6857	0	7.44369	3.25825	0	0	0	0	1.82032	2.88371	0	3.9759	0	6.3253	0	0	0	2.98848	3.36826	23.638	3.43635	27.9439	0	1.30959	3.10896
		-K2	0	3.58601	0	0	3.41128	0	6.70473	2.10894	0	0	0	0	2.95008	1.77777	0	4.26461	0	3.06589	0	0	0	1.50348	2.55999	22.3735	4.29306	36.2137	0	1.70463	3.4824
		-K3	0	3.24719	0	0	4.65288	0	6.48211	1.89675	0	0	0	0	2.3203	1.96121	0	6.66626	0	3.85796	0	0	0	1.61746	2.38782	20.585	4.72961	34.4055	0	2.52287	2.66712
		-P1	0	3.18141	0	0	5.65643	0	8.49249	6.66109	3.39072	0	0	0	6.28434	0	0	0	0	0	0	0	0	0	3.40642	6.92795	6.73957	33.4729	11.1716	2.68432	1.93083
		-P2	0	3.29548	0	0	2.16878	0	5.42864	3.38009	3.82543	0	0	0	6.9116	0	0	0	0	0	0	0	0	0	1.37163	8.31886	4.62703	39.4077	14.175	5.10354	1.98619
		-P3	0	2.07606	0	0	4.29052	0	3.58532	2.08265	8.20536	0	0	0	7.61221	0	0	0	0	0	0	0	0	0	1.50267	6.52475	1.52244	41.8902	12.8254	4.90345	2.97898
		-PK1	0	5.32814	0	0	4.58983	0	8.44545	2.69073	1.57916	0	0	0	1.54635	3.65874	0	1.14848	0	5.01641	0	0	0	2.45693	2.60049	14.3765	4.08942	36.9196	3.38802	0	2.16571
		-PK2	0	3.45817	0	0	3.79814	0	6.50199	2.75166	1.67331	0	0	0	1.90704	2.68792	0	4.40372	0	2.9429	0	0	0	1.73705	2.50199	17.3652	3.17663	38.6826	3.61753	0	2.79416
		-PK3	0	4.69525	0	0	2.69669	0	7.31323	2.50163	4.59943	0	0	0	2.15598	2.19705	0	1.72136	0	2.10123	0	0	0	1.13275	1.75216	14.4896	2.97389	44.1087	3.46326	0	2.09781
	RNA level		54bp	69bp	78bp	95bp	100bp	103bp	111bp	114bp	118bp	121bp	125bp	139bp	146bp	150bp	163bp	168bp	175bp	194bp	202bp	208bp	216bp	230bp	244bp	277bp	289bp	292bp	314bp	358bp	406bp
		NPK1	0	0	0	7.87002	2.1869	0	21.4919	0	0	1.15513	0	0	0	3.22147	0	0	0	0	6.76396	3.30558	54.0051	0	0	0	0	0	0	0	0
		NPK2	0	0	0	7.14799	2.52027	0	22.5723	0	0	6.66926	0	0	0	3.16457	0	0	0	0	10.61	3.40805	43.9076	0	0	0	0	0	0	0	0
		NPK3	0	0	0	8.00668	3.01683	0	22.5552	0	0	7.79751	0	0	0	3.50556	0	0	0	0	4.59162	4.5943	45.9323	0	0	0	0	0	0	0	0
		-K1	0	1.6717	0	7.63377	0	2.64283	17.1398	0	0	8.18456	0	0	0	5.60937	2.49305	0	2.07996	0	7.74973	2.78053	42.0147	0	0	0	0	0	0	0	0
		-K2	0	2.00216	0	8.58055	0	2.30986	19.5283	0	0	6.137	0	0	0	5.85901	2.58573	0	1.49818	0	5.62558	5.88129	39.9924	0	0	0	0	0	0	0	0
		-K3	0	2.40764	0	9.17696	0	2.42128	18.7176	0	0	6.94835	0	0	0	6.97083	2.23583	0	1.53498	0	5.36681	5.07458	39.1452	0	0	0	0	0	0	0	0
		-P1	1.80399	5.03098	1.38168	10.2272	5.11361	0	14.1611	0	0	0	0	0	2.67156	4.80606	0	0	4.61786	0	14.767	0	35.4189	0	0	0	0	0	0	0	0
		-P2	4.44731	2.12868	3.76176	8.80728	5.91446	0	17.0404	0	0	0	0	0	2.54132	2.58935	0	0	4.26391	0	5.89918	0	42.6064	0	0	0	0	0	0	0	0
		-P3	5.15202	1.83132	3.42469	8.33172	6.64317	0	20.1058	0	0	0	0	0	2.80779	3.26959	0	0	6.18489	0	6.82647	0	35.4226	0	0	0	0	0	0	0	0
		-PK1	1.65556	2.13333	3.66296	8.04444	4.91852	1.64815	16	0	0	7.11481	0	0	0	3.73333	2.91481	0	1.76296	0	7.22222	0	36.2741	0	0	0	0	2.91481	0	0	0
		-PK2	2.52082	2.72502	5.37064	8.17054	2.19863	2.11014	15.767	0	0	9.38443	0	0	0	4.13178	1.8492	0	1.84467	0	8.79223	0	28.7273	0	0	0	0	6.40755	0	0	0
		-PK3	1.87684	2.20126	2.96354	8.21193	7.58499	2.31669	15.5541	0	0	5.77581	0	0	0	3.55664	1.21209	0	1.43898	0	5.93305	0	41.1253	0	0	0	0	0.248786	0	0	0

## Sheet: pmoA T-RFLP
Tillering stage	DNA level		70bp	76bp	81bp	88bp	94bp	108bp	114bp	128bp	143bp	150bp	161bp	186bp	218bp	249bp	296bp	310bp	361bp	437bp	441bp	470bp	507bp
		NPK1	0	0	18.6055	0	0	0	2.13555	19.6712	0	0	0	0	0	4.02539	0	0	0	34.3977	17.5741	0	3.59064
		NPK2	0	0	18.9569	0	0	0	2.45563	18.5657	0	0	0	0	0	3.41905	0	0	0	35.4799	17.7255	0	3.39732
		NPK3	0	0	18.254	0	0	0	1.81547	20.7766	0	0	0	0	0	4.63174	0	0	0	33.3154	17.4228	0	3.78396
		-K1	0	2.09502	19.787	0	0	0	2.14403	14.3349	0	0	0	0	0	3.56902	0	0	0	36.7131	18.3087	0	3.04831
		-K2	0	1.8359	24.9901	0	0	0	2.96523	13.3951	0	0	0	0	0	3.36813	0	0	0	33.2308	16.5033	0	3.7115
		-K3	0	2.35414	14.584	0	0	0	1.32284	15.2746	0	0	0	0	0	3.76991	0	0	0	40.1953	20.1141	0	2.38512
		-P1	0	0	15.3246	0	0	0	1.71539	19.7641	0	1.71601	0	0	0	15.1712	0	0	0	29.7148	14.0275	0	2.56635
		-P2	0	0	18.1083	0	0	0	2.2393	22.8008	0	2.16578	0	0	0	14.1243	0	0	0	26.0963	11.8884	0	2.57687
		-P3	0	0	12.5409	0	0	0	1.19148	16.7274	0	1.26624	0	0	0	16.2181	0	0	0	33.3333	16.1667	0	2.55584
		-PK1	0	2.89662	29.6877	0	1.43804	0	2.80417	18.6149	0	0	0	0	0	21.4011	0	0	0	13.3891	6.42751	0	3.34087
		-PK2	0	3.34435	33.0076	0	2.88001	0	1.88867	15.286	0	0	0	0	0	18.5762	0	0	0	15.2661	7.20146	0	2.54957
		-PK3	0	3.12048	31.3477	0	2.15902	0	2.34642	16.9504	0	0	0	0	0	19.9886	0	0	0	14.3276	6.81448	0	2.94522
	RNA level		70bp	76bp	81bp	88bp	94bp	108bp	114bp	128bp	143bp	150bp	161bp	186bp	218bp	249bp	296bp	310bp	361bp	437bp	441bp	470bp	507bp
		NPK1	0	0	54.5492	2.88894	0	10.913	6.18442	13.8088	0	4.33114	0	0	0	2.6005	1.34908	1.69657	0	0	0	1.6784	0
		NPK2	0	0	34.3793	4.98868	0	15.5962	8.62312	24.105	0	2.36458	0	0	0	4.0232	2.69673	1.31045	0	0	0	1.91281	0
		NPK3	0	0	56.2445	2.73694	0	11.1249	5.17272	14.1674	0	2.58193	0	0	0	3.24624	2.28078	1.06732	0	0	0	1.37733	0
		-K1	0	0	43.9456	3.73913	0	11.0955	3.98027	24.4425	0	0	0	0	0	4.4016	4.20245	0	0	0	0	4.19297	0
		-K2	0	0	54.3656	7.14898	0	10.1642	4.05907	16.7857	0	0	0	0	0	3.42835	2.05481	0	0	0	0	1.99328	0
		-K3	0	0	52.9569	4.419	0	12.2071	7.19497	17.9133	0	0	0	0	0	2.77003	1.14479	0	0	0	0	1.39391	0
		-P1	0	0	29.6128	3.89728	0	1.57354	2.15767	21.2079	2.58535	29.7781	0	0	0	3.16625	0	0	4.75605	0	0	1.26508	0
		-P2	0	0	30.3251	4.86309	0	1.66654	2.50262	16.9553	1.59547	30.4523	0	0	0	3.86335	0	0	5.90771	0	0	1.86855	0
		-P3	0	0	28.9136	2.94935	0	1.48227	1.81911	25.3817	3.55691	29.1164	0	0	0	2.48206	0	0	3.62571	0	0	0.672784	0
		-PK1	0	0	16.8942	3.50148	0	1.41208	3.06196	35.2125	1.79817	27.8141	0	2.26307	0	4.90689	0.84431	0	2.29113	0	0	0	0
		-PK2	0	0	27.8751	5.08841	0	3.86519	1.67048	23.2449	1.62893	27.5671	0	1.89044	0	3.95806	1.26966	0	1.94176	0	0	0	0
		-PK3	0	0	22.3982	4.29691	0	2.64167	2.3645	29.2139	1.71334	27.6903	0	2.07629	0	4.4313	1.05751	0	2.11601	0	0	0	0
Ripening stage	DNA level		70bp	76bp	81bp	88bp	94bp	108bp	114bp	128bp	143bp	150bp	161bp	186bp	218bp	249bp	296bp	310bp	361bp	437bp	441bp	470bp	507bp
		NPK1	0	0	25.6416	0	0	1.02145	1.67212	18.7423	0	0	0	0	0	6.52854	0	0	0	25.518	18.0734	0	2.80262
		NPK2	0	0	24.7222	0	0	1.56503	1.7737	19.4481	0	0	0	0	0	5.8219	0	0	0	21.1696	22.9172	0	2.58229
		NPK3	0	0	31.7372	0	0	3.35909	1.86092	18.8123	0	0	0	0	0	7.95516	0	0	0	17.8982	14.0422	0	4.33489
		-K1	0	0	53.4318	0	0	1.88997	1.97764	16.799	0	0	0	0	0	9.78706	0	0	0	6.9698	5.31081	0	3.8339
		-K2	0	0	46.686	0	0	2.39649	2.50971	16.6732	0	0	0	0	0	7.73513	0	0	0	10.7653	9.7495	0	3.48466
		-K3	0	0	44.3429	0	0	2.78382	3.6451	21.3935	0	0	0	0	0	10.5196	0	0	0	7.36739	5.13963	0	4.8081
		-P1	0	0	13.7275	0	0	0	0	12.329	0	0	0	0	0	11.7635	0	0	0	36.4515	24.5642	0	1.16431
		-P2	0	0	18.3952	0	0	0	0	12.96	0	0	0	0	0	16.1067	0	0	0	27.8739	22.9964	0	1.66788
		-P3	0	0	14.9121	0	0	0	0	14.0468	0	0	0	0	0	13.1972	0	0	0	32.4257	23.1545	0	2.26373
		-PK1	0	0	49.6896	0	0	2.34784	2.53255	18.7115	0	0	0	0	0	15.173	0	0	0	5.04284	3.80105	0	2.70168
		-PK2	0	0	34.1113	0	0	2.24008	2.18704	16.0601	0	0	0	0	0	25.1795	0	0	0	10.2987	7.14461	0	2.77868
		-PK3	0	0	24.9541	0	0	1.63574	2.05008	24.3848	0	0	0	0	0	26.3664	0	0	0	11.2592	7.14106	0	2.20861
	RNA level		70bp	76bp	81bp	88bp	94bp	108bp	114bp	128bp	143bp	150bp	161bp	186bp	218bp	249bp	296bp	310bp	361bp	437bp	441bp	470bp	507bp
		NPK1	2.30293	0	35.158	7.86711	0	22.1854	7.29716	20.233	0	0	0	0	1.77391	0	0	1.89671	0	0	0	1.28582	0
		NPK2	1.60272	0	38.6115	9.62968	0	20.5675	7.64655	17.0999	0	0	0	0	1.84567	0	0	1.76933	0	0	0	1.22717	0
		NPK3	0.902513	0	42.065	11.3922	0	18.9496	7.99595	13.9668	0	0	0	0	1.91744	0	0	1.64194	0	0	0	1.16852	0
		-K1	5.32537	0	50.9665	4.30795	0	4.87075	8.69115	18.801	0	0	0	0	3.32189	0	1.97056	0	0	0	0	1.74481	0
		-K2	7.64513	0	49.9003	2.79371	0	7.83219	10.563	15.4375	0	0	0	0	1.74185	0	2.15125	0	0	0	0	1.93505	0
		-K3	7.97162	0	33.0608	4.08265	0	9.49968	10.5272	22.0789	0	0	0	0	3.96338	0	5.76668	0	0	0	0	3.04899	0
		-P1	0	0	65.0218	7.36393	0	1.09014	5.55434	18.5982	0	0.755326	0	0	0	0	0	0	0	0	0	1.61628	0
		-P2	0	0	47.6458	8.30491	0	4.952	9.77504	22.6265	0	4.5336	0	0	0	0	0	0	0	0	0	2.1622	0
		-P3	0	0	59.8905	6.18716	0	3.06383	7.40675	17.9309	0	4.40835	0	0	0	0	0	0	0	0	0	1.1125	0
		-PK1	4.59115	0	52.8179	5.02033	0	3.81748	4.80574	22.4531	0	0	0	0	3.34312	0	1.77321	0	0	0	0	1.37791	0
		-PK2	3.01934	0	49.477	5.81215	0	3.02846	4.14285	27.7533	0	0	0	0	2.27287	0	2.47203	0	0	0	0	2.02201	0
		-PK3	2.57535	0	52.2768	9.45694	0	4.60017	5.49594	18.3494	0	0	0	0	2.92059	0	2.51003	0	0	0	0	1.81487	0

## Sheet: qPCR
		(copies g-1 dry soil)						(copies g-1 dry soil)
mcrA							pmoA
	Tillering stage		Ripening stage					Tillering stage		Ripening stage
	DNA level	RNA level	DNA level	RNA level				DNA level	RNA level	DNA level	RNA level
NPK1	5.74275e+09	5.68109e+07	3.91053e+09	5.72218e+06			NPK1	8.18914e+07	1.47099e+07	3.14565e+07	1.90924e+07
NPK2	3.62276e+09	8.90317e+07	4.64129e+09	1.02262e+07			NPK2	8.43533e+07	1.87323e+07	3.56035e+07	1.91917e+07
NPK3	4.20608e+09	4.97918e+07	3.86574e+09	3.43339e+07			NPK3	8.68153e+07	1.02166e+07	3.49261e+07	1.89931e+07
-K1	4.42725e+09	2.82911e+07	1.95155e+09	8.97891e+06			-K1	3.40576e+07	5.12827e+06	2.67172e+07	2.65319e+07
-K2	7.49017e+09	1.29403e+07	2.36949e+09	1.69014e+07			-K2	1.01237e+08	2.65952e+06	5.24492e+07	2.75495e+07
-K3	5.95871e+09	2.12237e+07	2.28585e+09	1.12916e+07			-K3	2.72718e+07	3.27856e+06	5.10874e+07	2.82789e+07
-P1	2.25291e+09	1.42136e+07	2.43838e+09	4.89556e+06			-P1	4.49866e+07	2.68759e+07	5.41782e+07	1.17075e+07
-P2	4.42221e+09	3.78344e+07	2.78573e+09	2.44577e+06			-P2	6.98708e+07	2.18059e+07	9.86892e+07	1.04784e+07
-P3	5.04282e+09	5.37375e+07	3.36564e+09	1.90267e+07			-P3	1.7469e+08	3.1946e+07	9.18154e+07	9.24926e+06
-PK1	3.76163e+09	4.77975e+06	1.52216e+09	4.87592e+06			-PK1	1.09205e+08	3.49436e+06	4.15107e+07	5.86836e+06
-PK2	4.23843e+09	1.33581e+07	1.58172e+09	1.11252e+07			-PK2	9.67278e+07	3.49436e+06	4.58943e+07	4.02596e+06
-PK3	4.05994e+09	9.71782e+06	1.85168e+09	1.25024e+06			-PK3	8.42511e+07	5.63115e+06	5.54808e+07	2.18356e+06
