# Supplementary material for: Transcriptional activities of methanogens and methanotrophs vary with methane emission flux in rice soils under chronic nutrient constraints of phosphorus and potassium
Source: Copernicus journal article supplement (doi:10.5194/bg-13-6507-2016), 2016-12-13
Supplement: Supplementary file [file bg-13-6507-2016-supplement-title-page.pdf › bg-13-6507-2016-supplement-title-page.pdf]

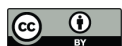

## *Supplement of*

# **Transcriptional activities of methanogens and methanotrophs vary with methane emission flux in rice soils under chronic nutrient constraints of phosphorus and potassium**

**Rong Sheng et al.**

*Correspondence to:* Wenxue Wei ([wenxuewei@isa.ac.cn](mailto:wenxuewei@isa.ac.cn))

- [bg-13-6507-2016-supplement-title-page.pdf](#)
- [Copy of Raw data.xlsx](#)
- [bg-2016-213-supplement-version2.pdf](#)

The copyright of individual parts of the supplement might differ from the CC-BY 3.0 licence.
